# Supplementary material
Source: PubMed Central journal article supplement (PMC4357533)

**Supplementary Table 1.** Crystal data collection statistics.

|                                        |                                                        |               |
|----------------------------------------|--------------------------------------------------------|---------------|
| X-ray wavelength (Å)                   | 0.9792                                                 |               |
| Space group                            | P2 <sub>1</sub> 2 <sub>1</sub> 2 <sub>1</sub>          |               |
| Unit cell dimensions                   | a = 31.6 Å, b = 43.6 Å, c = 65.6 Å,<br>α = β = γ = 90° |               |
| Resolution* (Å)                        | 26.2 – 1.25                                            | (1.27 - 1.25) |
| No. of unique reflections              | 23934                                                  | (749)         |
| Completeness                           | 92.5%                                                  | (59.3%)       |
| R-merge                                | 0.053                                                  | (0.48)        |
| CC1/2 (Å <sup>2</sup> )                | -                                                      | (0.82)        |
| I/σ                                    | 10.9                                                   | (2.04)        |
| Redundancy                             | 6.1                                                    | (3.1)         |
| Wilson plot B-factor (Å <sup>2</sup> ) | 10.9                                                   |               |
| Molecules per asymmetric unit          | 1                                                      |               |
| No. of protein residues                | 92                                                     |               |

\* Numbers in parenthesis are shown for the highest resolution shell.

**Supplementary Table 2.** Structure refinement statistics.

---

|                                               |             |               |
|-----------------------------------------------|-------------|---------------|
| Resolution range (Å)                          | 26.2 - 1.25 | (1.28 – 1.25) |
| Reflections                                   | 23883       | (1228)        |
| $\sigma$ cutoff                               | None        |               |
| R-value (all) (%)                             | 12.3        |               |
| R-value (R-work) (%)                          | 12.2        | (20.7)        |
| Free R-value (%)                              | 14.9        | (24.6)        |
| <b>Rms deviations from ideal geometry</b>     |             |               |
| bond length (Å)                               | 0.011       |               |
| angle (degrees)                               | 1.53        |               |
| chiral (Å)                                    | 0.096       |               |
| <b>No. of atoms</b>                           |             |               |
| protein                                       | 771         |               |
| water                                         | 148         |               |
| <b>Mean B-factor (Å<sup>2</sup>)</b>          |             |               |
| all atoms                                     | 17.3        |               |
| protein atoms                                 | 14.3        |               |
| protein main chain                            | 11.9        |               |
| protein side chain                            | 16.3        |               |
| water                                         | 32.7        |               |
| <b>Molprobit Ramachandran plot statistics</b> |             |               |
| Residues in favored regions (%)               | 100.0       |               |
| Residues in allowed regions (%)               | 100.0       |               |
| Residues in disallowed region (%)             | 0.0         |               |

---

## Supplementary Figure Legend

**Fig. 1. Malate dehydrogenase (MDH) refolding time course.** MDH was heat denatured and diluted into chaperone mixtures including the indicated J-protein and Hsp70, as well as Hsp104 and Sse1. Aliquots were removed at the indicated times and enzymatic activity determined. Activity of non-denatured enzyme was taken as 100%. Hsp70: Ssa1 (Hsp70 WT) or Ssa1 lacking the EEVD (Hsp70 $\Delta$ EEVD) (a) Sis1, Xdj1, and Ydj1 with Hsp70 WT or Hsp70 $\Delta$ EEVD. Activity at 90 min, Fig. 1c. (b) Sis1 and Sis1 with Xdj1 J-domain (J<sub>Xdj1</sub>Sis1) or Ydj1 J-domain (J<sub>Ydj1</sub>Sis1) with Hsp70 WT or Hsp70 $\Delta$ EEVD. Activity at 90 min, Fig. 2b. (c) Sis1 WT and chimeras having substituted segments 14-20 (A), 38-44 (B) or 52-61 (C) of Ydj1 with Hsp70 WT or Hsp70 $\Delta$ EEVD. Activity at 90 min, Fig. 3c. (d) Sis1 WT and variants with indicated substitutions with Hsp70 WT or Hsp70 $\Delta$ EEVD. Activity at 90 min, Fig. 4b. (e) Sis1 WT, E50A and R73A with Hsp70 WT or Hsp70 $\Delta$ EEVD. Activity at 90 min, Fig. 5c. (f) Sis1 WT and variants having indicated lysines substituted by asparagine with Hsp70 WT or Hsp70 $\Delta$ EEVD. Activity at 90 min, Fig. 6b. (g) Sis1 WT and Sis1 variants having lysine substitutions with or without additional substitution at E50 or R73, with Hsp70 WT or Hsp70 $\Delta$ EEVD. Activity at 90 min, Fig. 6c.

**Supplementary Fig. 1.**

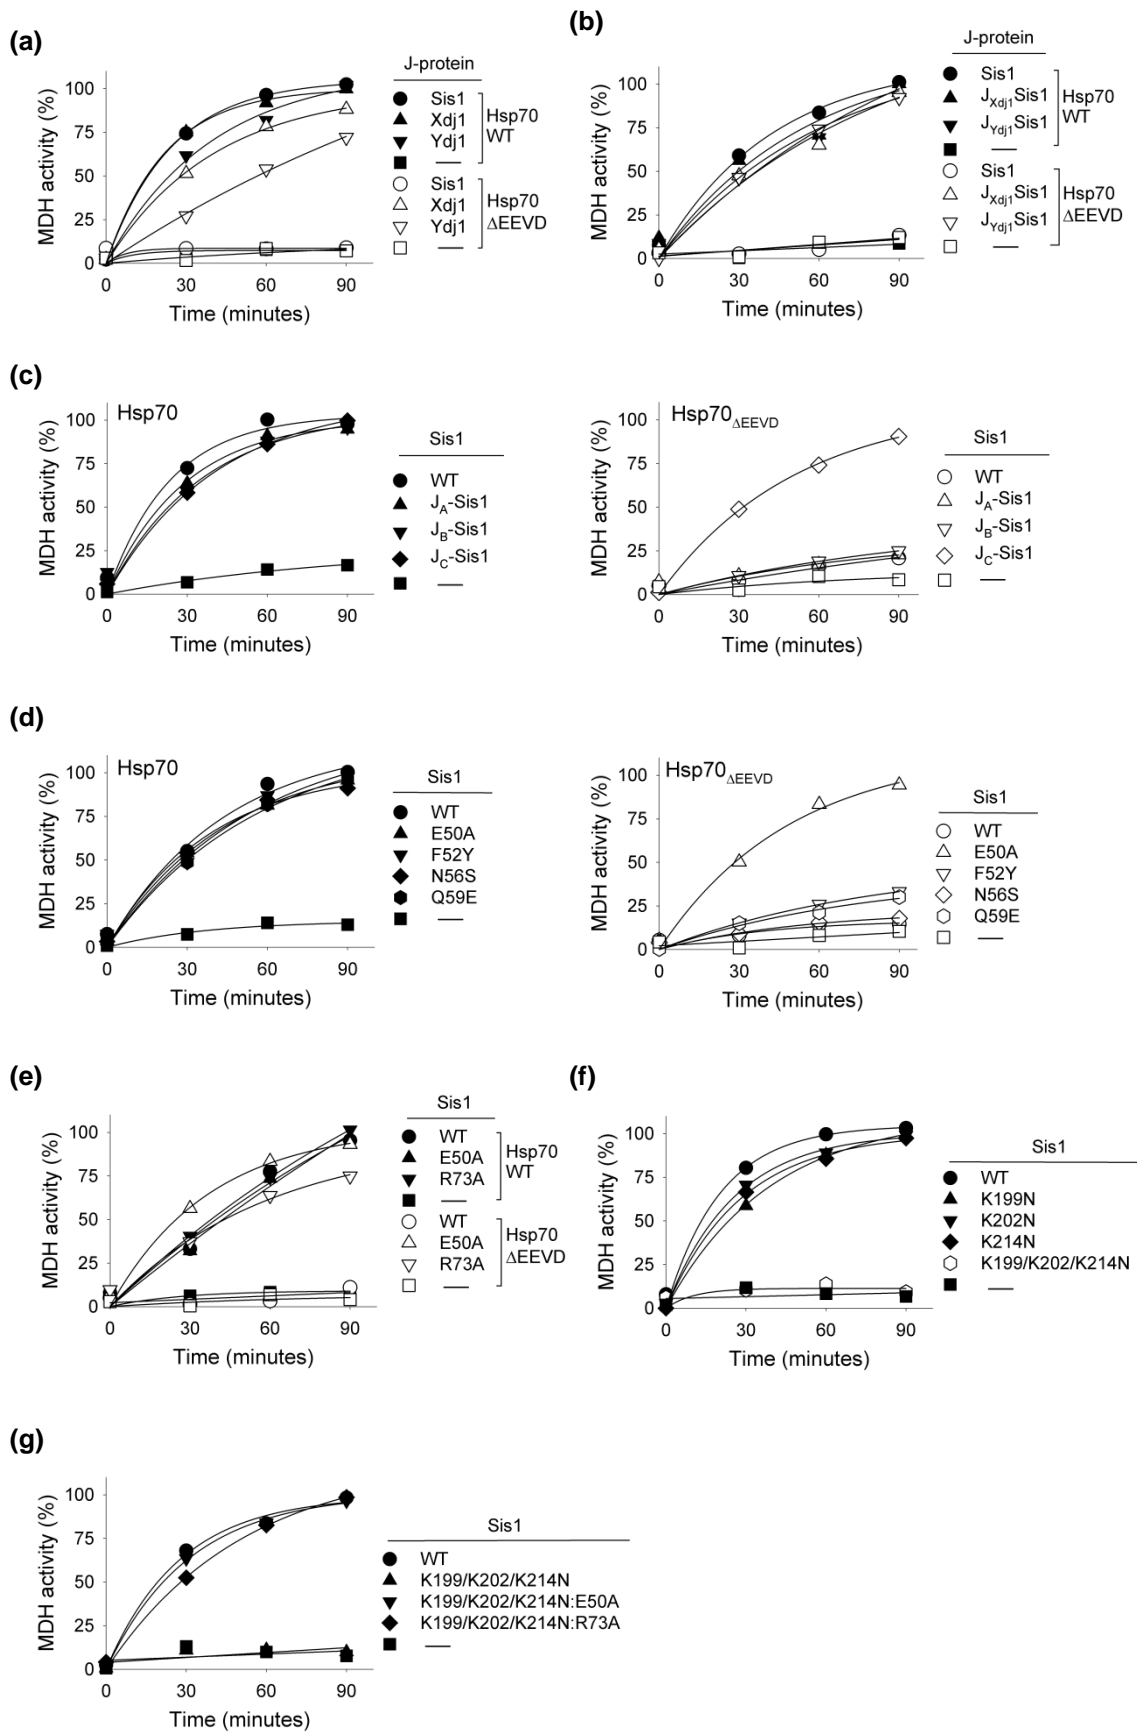

Supplement: NIHMS664269-supplement.pdf [file NIHMS664269-supplement.pdf]
